# Supplementary material for: Three H2O2 molecules are involved in the “Fenton-like” reaction between Co(H2O)62+ and H2O2
Source: Royal Society of Chemistry journal article supplement (doi:10.1039/c4dt00401a), 2014-01-01

### Supplementary Information:

**Figure S-1:** related to Experimental Section.

The results are affected by the concentration of the PIPES buffer, Figure S-1. These effects are attributed to complex formation between the  $\text{Co}^{\text{II}}$  central ion and the sulfate or sulfonate anions, which affects the binding of the peroxide ligands.

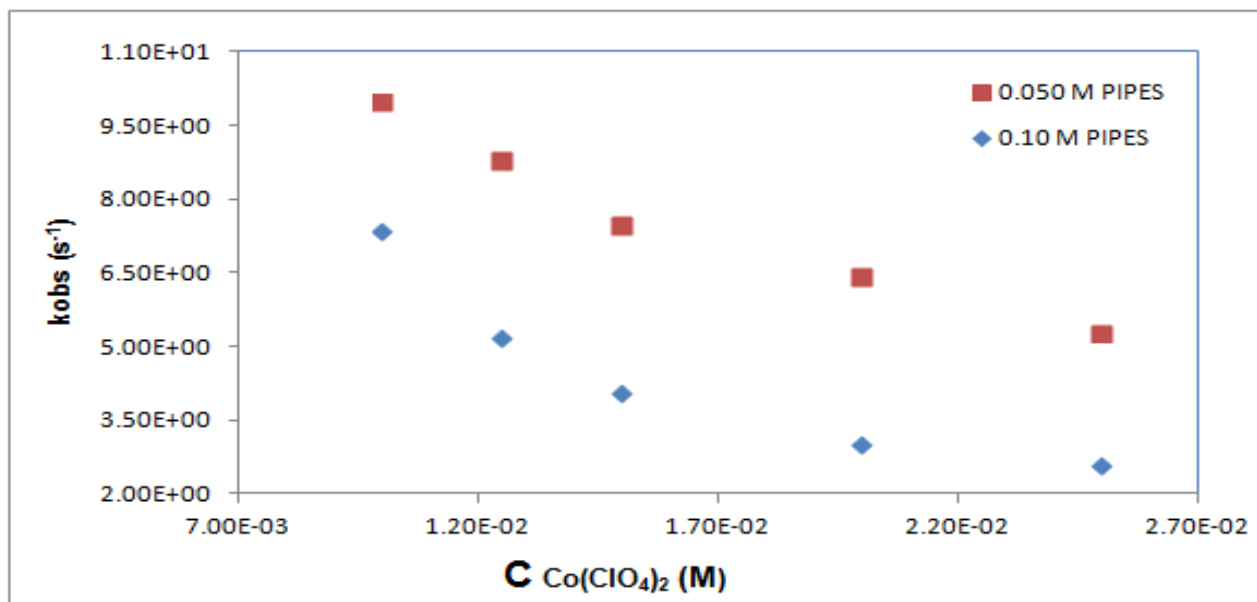

**Figure S-1: Dependence of  $k_{\text{obs}}$ , of first reaction observed, on  $[\text{Co}(\text{ClO}_4)_2]$ .**

Solutions composition: ■  $7.5 \times 10^{-4}$  M  $\text{H}_2\text{O}_2$ . pH 6.5, PIPES  $1.00 \times 10^{-1}$  M. Ionic strength  $5.5 \times 10^{-1}$  M controlled by adding  $\text{NaClO}_4$ . ◆  $7.5 \times 10^{-4}$  M  $\text{H}_2\text{O}_2$ . pH 6.5, PIPES  $5.0 \times 10^{-2}$  M. Ionic strength  $4.75 \times 10^{-1}$  M controlled by adding  $\text{NaClO}_4$ .

The data for Figure S-1 are summed up in table S-1

**Table S-1:  $k_{\text{obs}}$  as a function of  $[\text{Co}(\text{ClO}_4)_2]$  at two PIPES concentrations**

| $C_{\text{Co}(\text{ClO}_4)_2}$ M | $k_{\text{obs}}$ $\text{s}^{-1}$<br>0.050M PIPES | $k_{\text{obs}}$ $\text{s}^{-1}$<br>0.10M PIPES |
|-----------------------------------|--------------------------------------------------|-------------------------------------------------|
| 0.010                             | 9.99                                             | 7.34                                            |
| 0.013                             | 8.81                                             | 5.19                                            |
| 0.015                             | 7.49                                             | 4.07                                            |
| 0.020                             | 6.44                                             | 3.04                                            |
| 0.025                             | 5.29                                             | 2.58                                            |

**Figure S-2** related to Experimental methods.

The results presented in Figure S-2, show that the kinetics of the reactions are affected by  $[\text{SO}_4^{2-}]$ , therefore all the results presented are for  $\text{Co}(\text{ClO}_4)_2$ . Ionic strength doesn't affect the observed rate constants, Figure S-2.

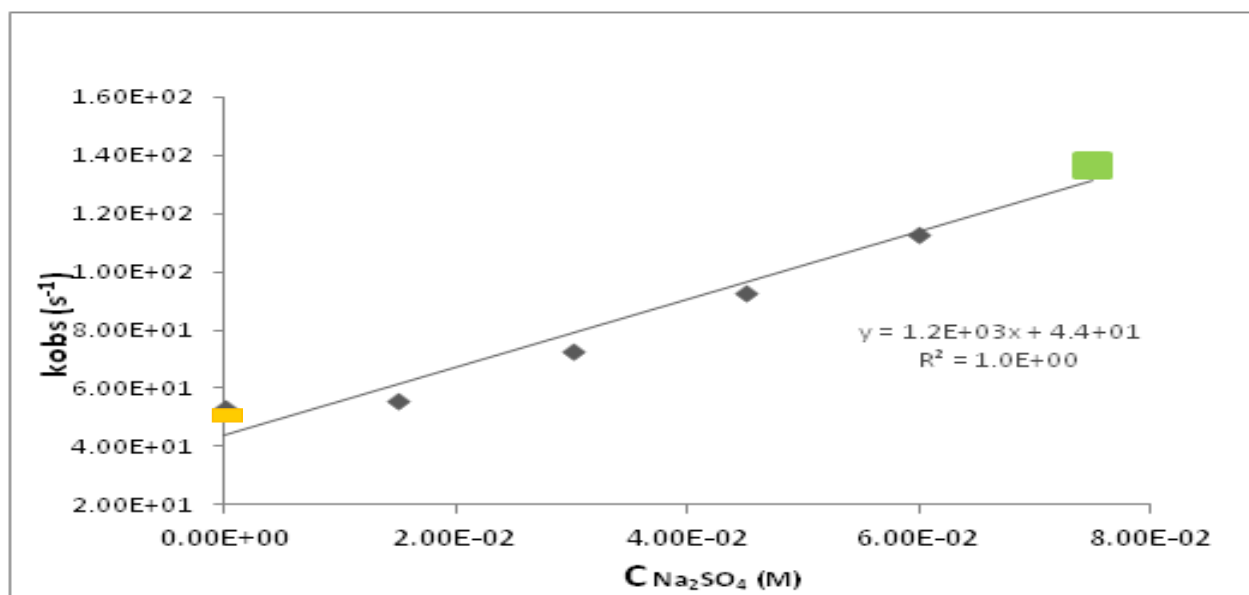

**Figure S-2: Dependence of  $k_{\text{obs}}$  on  $C_{\text{Na}_2\text{SO}_4}$ .**

Solutions composition:  $1.5 \times 10^{-2}$  M  $\text{Co}(\text{ClO}_4)_2$ ,  $1.5 \times 10^{-1}$  M  $\text{H}_2\text{O}_2$ . In pH 6.5, HEPES buffer (4-(2-Hydroxyethyl)piperazine-1-ethanesulfonic acid sodium salt)  $1.0 \times 10^{-1}$  M, ionic strength for ■ and ■  $3.7 \times 10^{-1}$  M, controlled by adding  $\text{NaClO}_4$ .

The data for Figure S-2 are summed up in table S-2

**Table S-2:  $k_{\text{obs}}$  as a function of  $C_{\text{Na}_2\text{SO}_4}$ :**

| $C_{\text{Na}_2\text{SO}_4}$ M | $k_{\text{obs}}$ $\text{s}^{-1}$ |
|--------------------------------|----------------------------------|
| 0.000                          | 53.5                             |
| 0.015                          | 55.6                             |
| 0.030                          | 72.9                             |
| 0.045                          | 93.0                             |
| 0.060                          | 112                              |
| 0.075                          | 137                              |

**Table S-3:  $k_{\text{obs}}$  as a function of  $C_{\text{H}_2\text{O}_2}$  (data for figure 1):**

| $C_{\text{H}_2\text{O}_2}$ M | $k_{\text{obs}}$ $\text{s}^{-1}$ |
|------------------------------|----------------------------------|
| 0.0750                       | 7.84                             |
| 0.105                        | 10.2                             |
| 0.150                        | 11.9                             |
| 0.200                        | 14.4                             |
| 0.240                        | 15.7                             |

**Table S-4:  $k_{\text{obs}}$  as a function of  $C_{\text{Co}(\text{ClO}_4)_2}$  (data for figure 2):**

| $C_{\text{Co}(\text{ClO}_4)_2}$ M | $k_{\text{obs}}$ $\text{s}^{-1}$ |
|-----------------------------------|----------------------------------|
| 0.0100                            | 7.34                             |
| 0.0125                            | 5.19                             |
| 0.0150                            | 4.07                             |
| 0.0200                            | 3.04                             |
| 0.0250                            | 2.58                             |

**Table S-5:  $k_{\text{obs}}$  as a function of  $C_{\text{H}_2\text{O}_2}$  (data for figure 3):**

| $C_{\text{H}_2\text{O}_2}$ M | $k_{\text{obs}}$ $\text{s}^{-1}$ |
|------------------------------|----------------------------------|
| 0.075                        | 0.37                             |
| 0.105                        | 0.45                             |
| 0.150                        | 0.53                             |
| 0.200                        | 0.62                             |
| 0.240                        | 0.78                             |

**Table S-6:  $k_{\text{obs}}$  as a function of  $C_{\text{Co}(\text{ClO}_4)_2}$  (data for figure 4):**

| $C_{\text{Co}(\text{ClO}_4)_2}$ M | $k_{\text{obs}}$ $\text{s}^{-1}$ |
|-----------------------------------|----------------------------------|
| 0.0125                            | 0.46                             |
| 0.0150                            | 0.37                             |
| 0.0200                            | 0.31                             |
| 0.0250                            | 0.28                             |

**Figure S-3** related to DFT calculations, reaction (10).

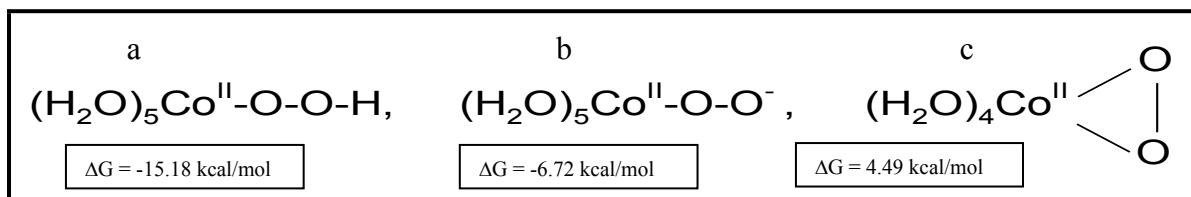

**Figure S-3: The three plausible species a, b, c that can be formed in reactions S(1), S(2), S(3) respectively.**

**Reactions S(1) – S(3)** related to DFT calculations, reaction (10).

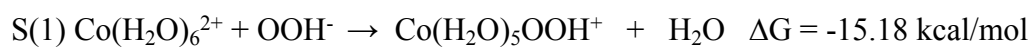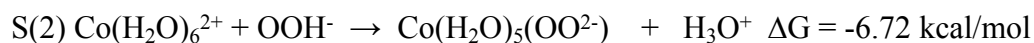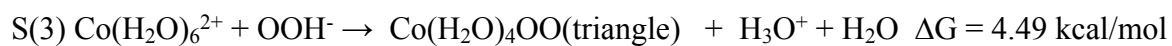

Supplement: c4dt00401a1.pdf [file c4dt00401a1.pdf]
